# Supplementary material for: Single-cell atlas of bronchoalveolar lavage from preschool cystic fibrosis reveals new cell phenotypes
Source: bioRxiv or medRxiv preprint supplement (doi:10.1101/2022.06.17.496207), 2022-12-22
Supplement: Supplementary file [file media-1.pdf]

## SUPPLEMENTARY TABLES AND FIGURES

**Supplementary Table 1.** Study cohort and demographics

| <b>Participant</b> | <b>Sex</b> | <b>Age (years)</b> | <b>CF or control</b> | <b>scRNA-seq</b> | <b>Totalseq ADT</b> |
|--------------------|------------|--------------------|----------------------|------------------|---------------------|
| <b>A1_Ctrl</b>     | M          | 3.00               | Control              | Y                |                     |
| <b>B1_CF</b>       | M          | 2.99               | CF                   | Y                |                     |
| <b>C1_CF</b>       | M          | 2.99               | CF                   | Y                |                     |
| <b>D1_CF</b>       | M          | 3.03               | CF                   | Y                |                     |
| <b>E2_CF</b>       | F          | 5.99               | CF                   | Y                | Y                   |
| <b>F2_CF</b>       | F          | 6.02               | CF                   | Y                | Y                   |
| <b>G2_CF</b>       | F          | 4.91               | CF                   | Y                | Y                   |
| <b>H2_CF</b>       | F          | 5.89               | CF                   | Y                | Y                   |
| <b>I2_CF</b>       | F          | 5.93               | CF                   | Y                | Y                   |
| <b>J2_CF</b>       | M          | 5.05               | CF                   | Y                | Y                   |
| <b>K2_CF</b>       | M          | 4.92               | CF                   | Y                | Y                   |
| <b>L2_CF</b>       | M          | 5.95               | CF                   | Y                | Y                   |

**Supplementary Table 2.** Concordance between HTO and genetic assignments.

| HTO / genetic donor | donor_ A | donor_ B | donor_ C | donor_ D | donor_ E | donor_ F | donor_ G | donor_ H | Doublet | Unknown | Total |
|---------------------|----------|----------|----------|----------|----------|----------|----------|----------|---------|---------|-------|
| HTO_1               | 0        | 1620     | 3        | 1        | 1        | 0        | 9        | 0        | 16      | 15      | 1665  |
| HTO_2               | 0        | 2        | 1        | 1        | 1        | 0        | 2763     | 2        | 49      | 30      | 2849  |
| HTO_3               | 1        | 1        | 1        | 0        | 3267     | 0        | 0        | 2        | 17      | 8       | 3297  |
| HTO_4               | 1        | 0        | 1663     | 0        | 0        | 0        | 0        | 0        | 7       | 2       | 1673  |
| HTO_5               | 0        | 0        | 1        | 2        | 2        | 2913     | 0        | 1        | 30      | 8       | 2957  |
| HTO_6               | 0        | 0        | 1        | 1861     | 0        | 1        | 0        | 1        | 8       | 6       | 1878  |
| HTO_7               | 0        | 1        | 0        | 1        | 0        | 0        | 1        | 2310     | 14      | 6       | 2333  |
| HTO_8               | 2274     | 1        | 3        | 4        | 2        | 1        | 3        | 2        | 30      | 81      | 2401  |
| Doublet             | 181      | 163      | 248      | 216      | 380      | 330      | 273      | 281      | 1581    | 29      | 3682  |
| Unknown             | 133      | 86       | 482      | 227      | 178      | 47       | 63       | 155      | 384     | 338     | 2093  |
| <b>Total</b>        | 2590     | 1874     | 2403     | 2313     | 3831     | 3292     | 3112     | 2754     | 2136    | 523     | 24828 |

**Supplementary Table 3.** Flow cytometry antibody cocktail

| <b>Surface Marker</b> | <b>Fluorophore</b> | <b>Clone</b> | <b>Final Dilution</b> |
|-----------------------|--------------------|--------------|-----------------------|
| CD16                  | BUV395             | 3G8          | 1:400                 |
| SIRP $\alpha$         | BUV563             | SE5A5        | 1:100                 |
| CD47                  | BUV737             | B6H12        | 1:00                  |
| CD206                 | BV421              | G10F5        | 1:50                  |
| HLADR                 | V500               | G46-6        | 1:100                 |
| CD19                  | BV605              | SJ25C1       | 1:100                 |
| CD8                   | BV650              | RPA-T8       | 1:100                 |
| CD45                  | BV711              | HI30         | 1:50                  |
| CD14                  | BV786              | M5E2         | 1:25                  |
| EPCAM                 | BB515              | EBA-1        | 1:100                 |
| CD3                   | FITC               | SK7          | 1:50                  |
| PD1                   | BB700              | EH12.1       | 1:100                 |
| CD66b                 | PE                 | 19.2         | 1:100                 |
| CD15                  | PECF594            | W6D3         | 1:100                 |
| CD11c                 | PECy7              | B-ly6        | 1:50                  |
| CD63                  | A647               | H5C6         | 1:50                  |
| CD4                   | A700               | RPA-T4       | 1:25                  |

**Supplementary Table 4.** REACTOME analysis of macrophage subclusters.

|                                                                                                                   | Direction | PValue    | FDR       |
|-------------------------------------------------------------------------------------------------------------------|-----------|-----------|-----------|
| <b>macro-IFN<math>\alpha</math>/<math>\beta</math></b>                                                            |           |           |           |
| REACTOME_INTERFERON_ALPHA_BETA_SIGNALING                                                                          | Up        | 2.33E-46  | 1.57E-43  |
| REACTOME_INTERFERON_SIGNALING                                                                                     | Up        | 9.49E-12  | 3.20E-09  |
| <b>macro-lipid</b>                                                                                                |           |           |           |
| REACTOME_LIPID_DIGESTION_MOBILIZATION_AND_TRANSPORT                                                               | Up        | 1.24E-26  | 2.79E-24  |
| REACTOME_HDL_MEDIATED_LIPID_TRANSPORT                                                                             | Up        | 7.27E-24  | 1.23E-21  |
| <b>macro-int</b>                                                                                                  |           |           |           |
| REACTOME_CREATION_OF_C4_AND_C2_ACTIVATORS                                                                         | Down      | 2.82E-288 | 1.90E-285 |
| REACTOME_INITIAL_TRIGGERING_OF_COMPLEMENT                                                                         | Down      | 1.73E-184 | 5.85E-182 |
| <b>macro-CCL</b>                                                                                                  |           |           |           |
| REACTOME_CHEMOKINE_RECEPTORS_BIND_CHEMOKINES                                                                      | Up        | 4.17E-87  | 2.81E-84  |
| REACTOME_PEPTIDE_LIGAND_BINDING_RECEPTORS                                                                         | Up        | 2.52E-29  | 8.50E-27  |
| <b>macro-vesicle</b>                                                                                              |           |           |           |
| REACTOME_AMYLOIDS                                                                                                 | Up        | 3.10E-43  | 2.09E-40  |
| REACTOME_INITIAL_TRIGGERING_OF_COMPLEMENT                                                                         | Up        | 1.59E-42  | 5.34E-40  |
| <b>macro-viral</b>                                                                                                |           |           |           |
| REACTOME_INTERFERON_SIGNALING                                                                                     | Up        | 1.73E-137 | 5.82E-135 |
| REACTOME_ANTIVIRAL_MECHANISM_BY_IFN_STIMULATED_GENES                                                              | Up        | 4.22E-81  | 9.48E-79  |
| <b>macro-MT</b>                                                                                                   |           |           |           |
| REACTOME_INTERFERON_GAMMA_SIGNALING                                                                               | Up        | 6.28E-07  | 4.23E-04  |
| <b>macro-repair</b>                                                                                               |           |           |           |
| REACTOME_AKT_PHOSPHORYLATES_TARGETS_IN_THE_CYTOSOL                                                                | Up        | 1.16E-202 | 7.81E-200 |
| REACTOME_PIP3_ACTIVATES_AKT_SIGNALING                                                                             | Up        | 4.36E-86  | 1.47E-83  |
| <b>macro-cholesterol</b>                                                                                          |           |           |           |
| REACTOME_CHOLESTEROL_BIOSYNTHESIS                                                                                 | Up        | 0         | 0         |
| REACTOME_CHYLOMICRON_MEDIATED_LIPID_TRANSPORT                                                                     | Up        | 4.84E-24  | 1.63E-21  |
| <b>proliferating-macrophage</b>                                                                                   |           |           |           |
| REACTOME_APC_C_CDH1_MEDIATED_DEGRADATION_OF_CDC20_AND_OTHER_APC_C_CDH1_TARGETED_PROTEINS_IN_LATE_MITOSIS_EARLY_G1 | Up        | 2.33E-10  | 1.26E-07  |
| REACTOME_APC_C_CDH1_MEDIATED_DEGRADATION_OF_MITOTIC_PROTEINS                                                      | Up        | 3.75E-10  | 1.26E-07  |
| <b>macro-T</b>                                                                                                    |           |           |           |
| REACTOME_TRANSLOCATION_OF_ZAP_70_TO_IMMUNOLOGICAL_SYNAPSE                                                         | Up        | 8.37E-180 | 5.64E-177 |
| REACTOME_PHOSPHORYLATION_OF_CD3_AND_TCR_ZETA_CHAINS                                                               | Up        | 1.42E-152 | 4.78E-150 |
| <b>macro-interstitial</b>                                                                                         |           |           |           |
| REACTOME_COMMON_PATHWAY                                                                                           | Up        | 4.75E-29  | 3.20E-26  |
| REACTOME_FORMATION_OF_FIBRIN_CLOT_CLOTTING_CASCADE                                                                | Up        | 5.53E-13  | 1.86E-10  |
| <b>macro-reg</b>                                                                                                  |           |           |           |
| REACTOME_CREATION_OF_C4_AND_C2_ACTIVATORS                                                                         | Down      | 6.75E-162 | 4.55E-159 |
| REACTOME_INITIAL_TRIGGERING_OF_COMPLEMENT                                                                         | Down      | 1.32E-77  | 4.45E-75  |

\*the two most significant (FDR) pathways per functional subcluster are presented

**Supplementary Table 5. REACTOME analysis of T/NK subclusters**

|                                                                                                                | Direction | PValue     | FDR         |
|----------------------------------------------------------------------------------------------------------------|-----------|------------|-------------|
| <b>CD4 T</b>                                                                                                   |           |            |             |
| REACTOME_CHEMOKINE_RECEPTORS_BIND_CHEMOKINES                                                                   | Down      | 1.12E-06   | 7.56E-04    |
| REACTOME_IMMUNOREGULATORY_INTERACTIONS_BETWEEN_A_LYMPHOID_AND_A_NON_LYMPHOID_CELL                              | Down      | 0.01666626 | 0.999955616 |
| <b>CD8 Trm</b>                                                                                                 |           |            |             |
| REACTOME_IMMUNOREGULATORY_INTERACTIONS_BETWEEN_A_LYMPHOID_AND_A_NON_LYMPHOID_CELL                              | Up        | 1.46E-41   | 9.82E-39    |
| REACTOME_TRANSLOCATION_OF_ZAP_70_TO_IMMUNOLOGICAL_SYNAPSE                                                      | Up        | 2.20E-29   | 7.42E-27    |
| <b>innate lymphocyte</b>                                                                                       |           |            |             |
| REACTOME_DEADENYLATION_OF_MRNA                                                                                 | Up        | 0.00189422 | 0.690751972 |
| REACTOME_ACTIVATION_OF_THE_MRNA_UPON_BINDING_OF_THE_CAP_BINDING_COMPLEX_AND_EIF5_AND_SUBSEQUENT_BINDING_TO_43S | Up        | 0.00345795 | 0.690751972 |
| <b>CD8 GZMK</b>                                                                                                |           |            |             |
| REACTOME_CHEMOKINE_RECEPTORS_BIND_CHEMOKINES                                                                   | Up        | 4.60E-15   | 3.10E-12    |
| REACTOME_APOBEC3G_MEDIATED_RESISTANCE_TO_HIV1_INFECTION                                                        | Up        | 1.82E-14   | 6.14E-12    |
| <b>NK T cells</b>                                                                                              |           |            |             |
| REACTOME_IMMUNOREGULATORY_INTERACTIONS_BETWEEN_A_LYMPHOID_AND_A_NON_LYMPHOID_CELL                              | Up        | 1.48E-41   | 9.98E-39    |
| REACTOME_OTHER_SEMAPHORIN_INTERACTIONS                                                                         | Up        | 3.88E-12   | 1.31E-09    |
| <b>NK cells</b>                                                                                                |           |            |             |
| REACTOME_TRANSLOCATION_OF_ZAP_70_TO_IMMUNOLOGICAL_SYNAPSE                                                      | Down      | 8.52E-71   | 5.74E-68    |
| REACTOME_PHOSPHORYLATION_OF_CD3_AND_TCR_ZETA_CHAINS                                                            | Down      | 1.56E-60   | 5.26E-58    |
| <b>γδ T cells</b>                                                                                              |           |            |             |
| REACTOME_CHEMOKINE_RECEPTORS_BIND_CHEMOKINES                                                                   | Up        | 2.95E-09   | 1.99E-06    |
| REACTOME_APOBEC3G_MEDIATED_RESISTANCE_TO_HIV1_INFECTION                                                        | Up        | 1.34E-07   | 4.50E-05    |
| <b>CD4 Treg</b>                                                                                                |           |            |             |
| REACTOME_CTLA4_INHIBITORY_SIGNALING                                                                            | Up        | 1.55E-18   | 1.05E-15    |
| REACTOME_IL_RECEPTOR_SHC_SIGNALING                                                                             | Up        | 6.32E-15   | 2.13E-12    |
| <b>CD4 NFκB</b>                                                                                                |           |            |             |
| REACTOME_NFKB_IS_ACTIVATED_AND_SIGNALS_SURVIVAL                                                                | Up        | 1.62E-19   | 1.09E-16    |
| REACTOME_RIP_MEDIATED_NFKB_ACTIVATION_VIA_DAI                                                                  | Up        | 8.19E-14   | 2.76E-11    |
| <b>CD4 IFN</b>                                                                                                 |           |            |             |
| REACTOME_INTERFERON_ALPHA_BETA_SIGNALING                                                                       | Up        | 0          | 0           |
| REACTOME_INTERFERON_SIGNALING                                                                                  | Up        | 1.33E-106  | 2.99E-104   |
| <b>proliferating NK/T</b>                                                                                      |           |            |             |
| REACTOME_G1_S_SPECIFIC_TRANSCRIPTION                                                                           | Up        | 1.50E-261  | 1.01E-258   |
| REACTOME_E2F_MEDIATED_REGULATION_OF_DNA_REPLICATION                                                            | Up        | 3.01E-123  | 1.01E-120   |
| <b>CD4 TFH</b>                                                                                                 |           |            |             |
| REACTOME_PD1_SIGNALING                                                                                         | Up        | 3.17E-36   | 2.14E-33    |
| REACTOME_IL_6_SIGNALING                                                                                        | Up        | 2.62E-35   | 8.84E-33    |

\*the two most significant (FDR) pathways per functional subcluster are presented

**Supplementary Table 6. REACTOME analysis of myeloid, B, and epithelial cell clusters**

|                                                                                       | Direction | PValue      | FDR         |
|---------------------------------------------------------------------------------------|-----------|-------------|-------------|
| <b>B cells</b>                                                                        |           |             |             |
| REACTOME_ANTIGEN_ACTIVATES_B_CELL_RECEPTOR_LEADING_TO_GENERATION_OF_SECOND_MESSENGERS | Up        | 1.27E-61    | 8.59E-59    |
| REACTOME_PHOSPHORYLATION_OF_CD3_AND_TCR_ZETA_CHAINS                                   | Up        | 4.77E-22    | 1.61E-19    |
| <b>Basal cells</b>                                                                    |           |             |             |
| REACTOME_ENDOSOMAL_VACUOLAR_PATHWAY                                                   | Down      | 1.13E-185   | 7.58E-183   |
| REACTOME_PHOSPHORYLATION_OF_CD3_AND_TCR_ZETA_CHAINS                                   | Down      | 2.79E-156   | 9.40E-154   |
| <b>cDC2</b>                                                                           |           |             |             |
| REACTOME_PHOSPHORYLATION_OF_CD3_AND_TCR_ZETA_CHAINS                                   | Up        | 7.89E-118   | 5.32E-115   |
| REACTOME_TRANSLOCATION_OF_ZAP_70_TO_IMMUNOLOGICAL_SYNAPSE                             | Up        | 9.03E-103   | 3.04E-100   |
| <b>monocytes</b>                                                                      |           |             |             |
| REACTOME_CREATION_OF_C4_AND_C2_ACTIVATORS                                             | Up        | 3.28E-87    | 2.21E-84    |
| REACTOME_TRANSLOCATION_OF_ZAP_70_TO_IMMUNOLOGICAL_SYNAPSE                             | Up        | 2.19E-79    | 7.39E-77    |
| <b>goblet/club cell</b>                                                               |           |             |             |
| REACTOME_ENDOSOMAL_VACUOLAR_PATHWAY                                                   | Down      | 1.92E-165   | 1.30E-162   |
| REACTOME_PHOSPHORYLATION_OF_CD3_AND_TCR_ZETA_CHAINS                                   | Down      | 3.95E-146   | 1.33E-143   |
| <b>endothelial cell</b>                                                               |           |             |             |
| REACTOME_PHOSPHORYLATION_OF_CD3_AND_TCR_ZETA_CHAINS                                   | Down      | 9.90E-103   | 6.68E-100   |
| REACTOME_TRANSLOCATION_OF_ZAP_70_TO_IMMUNOLOGICAL_SYNAPSE                             | Down      | 1.48E-87    | 4.98E-85    |
| <b>ciliated cell</b>                                                                  |           |             |             |
| REACTOME_TERMINATION_OF_O_GLYCAN_BIOSYNTHESIS                                         | Up        | 8.55E-04    | 0.440823574 |
| REACTOME_GLUTATHIONE_CONJUGATION                                                      | Up        | 0.001308082 | 0.440823574 |
| <b>migratory DC</b>                                                                   |           |             |             |
| REACTOME_CHEMOKINE_RECEPTORS_BIND_CHEMOKINES                                          | Up        | 7.97E-12    | 2.69E-09    |
| REACTOME_IL_7_SIGNALING                                                               | Up        | 7.21E-11    | 1.62E-08    |
| <b>plasmacytoid DC</b>                                                                |           |             |             |
| REACTOME_INTRINSIC_PATHWAY_FOR_APOPTOSIS                                              | Up        | 8.74E-26    | 5.89E-23    |
| REACTOME_GLUCAGON_TYPE_LIGAND_RECEPTORS                                               | Up        | 4.09E-18    | 1.38E-15    |
| <b>neutrophil</b>                                                                     |           |             |             |
| REACTOME_TRAFFICKING_AND_PROCESSING_OF_ENDOSOMAL_TLR                                  | Up        | 4.75E-21    | 3.20E-18    |
| REACTOME_SIGNAL_REGULATORY_PROTEIN_SIRP_FAMILY_INTERACTIONS                           | Up        | 1.40E-16    | 4.72E-14    |
| <b>cDC1</b>                                                                           |           |             |             |
| REACTOME_TRANSLOCATION_OF_ZAP_70_TO_IMMUNOLOGICAL_SYNAPSE                             | Up        | 5.72E-39    | 3.86E-36    |
| REACTOME_PHOSPHORYLATION_OF_CD3_AND_TCR_ZETA_CHAINS                                   | Up        | 4.32E-38    | 1.45E-35    |
| <b>tracheobronchial goblet/club cells</b>                                             |           |             |             |
| REACTOME_ETHANOL_OXIDATION                                                            | Up        | 1.04E-18    | 7.02E-16    |
| REACTOME_XENOBIOTICS                                                                  | Up        | 3.32E-13    | 1.12E-10    |
| <b>dividing B cells</b>                                                               |           |             |             |
| REACTOME_G1_S_SPECIFIC_TRANSCRIPTION                                                  | Up        | 3.97E-48    | 2.68E-45    |
| REACTOME_E2F_MEDIATED_REGULATION_OF_DNA_REPLICATION                                   | Up        | 1.30E-32    | 4.40E-30    |
| <b>mast cells</b>                                                                     |           |             |             |
| REACTOME_NA_CL_DEPENDENT_NEUROTRANSMITTER_TRANSPORTERS                                | Up        | 3.48E-33    | 1.17E-30    |
| REACTOME_DEGRADATION_OF_THE_EXTRACELLULAR_MATRIX                                      | Up        | 7.81E-31    | 1.76E-28    |
| <b>plasma B cells</b>                                                                 |           |             |             |
| REACTOME_TRANSLOCATION_OF_ZAP_70_TO_IMMUNOLOGICAL_SYNAPSE                             | Down      | 1.18E-33    | 4.30E-31    |
| REACTOME_SYNTHESIS_SECRETION_AND_DEACYLATION_OF_GHRELIN                               | Up        | 1.34E-33    | 4.30E-31    |

\*the two most significant (FDR) pathways per functional subcluster are presented

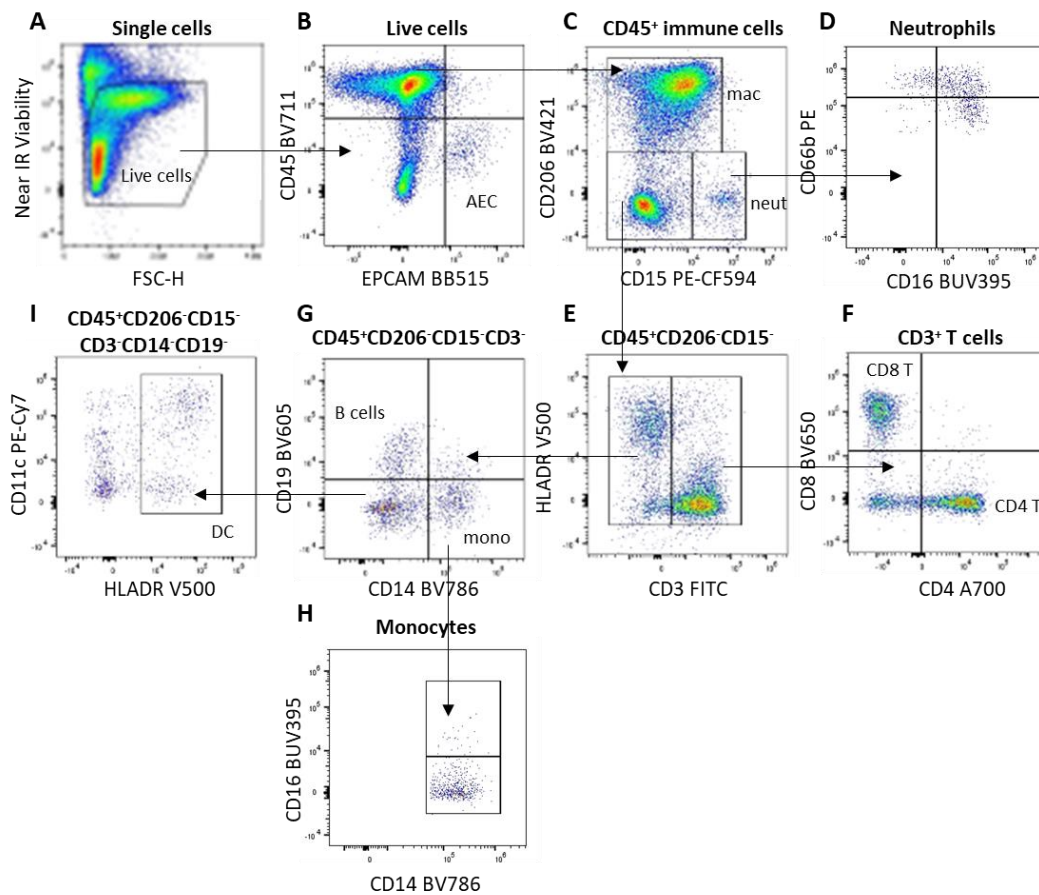

**Supplementary Figure 1.** Representative flow cytometry manual gating of BAL cells. **(A)** Live cells were negative for near IR viability dye. **(B)** Within the live single cell gate, immune cells were CD45<sup>+</sup> and airway epithelial cells (AEC) were CD45<sup>-</sup>EPCAM<sup>+</sup>. **(C)** Macrophages were identified within the CD45<sup>+</sup> immune cell gate by expression of CD206, and neutrophils were CD206<sup>-</sup>CD15<sup>+</sup>. **(D)** Within the neutrophil populations, three subtypes were identified: CD16<sup>-</sup>CD66b<sup>high</sup>, CD16<sup>+</sup>CD66b<sup>high</sup> and CD16<sup>+</sup>CD66b<sup>low</sup>. **(E)** Within the CD45<sup>+</sup>CD206<sup>-</sup>CD15<sup>-</sup> population, T cells were CD3<sup>+</sup> and these were then identified as **(F)** CD4<sup>+</sup> or CD8<sup>+</sup> T cells. **(G)** Within the CD45<sup>+</sup>CD206<sup>-</sup>CD15<sup>-</sup>CD3<sup>-</sup> gate, monocytes were identified based on CD14 expression and B cells were CD14<sup>-</sup>CD19<sup>+</sup>. **(H)** A small proportion of monocytes were positive for CD16. **(I)** Finally, cells negative for all preceding markers (excluding CD45) were identified as DCs based on positive staining for HLADR.

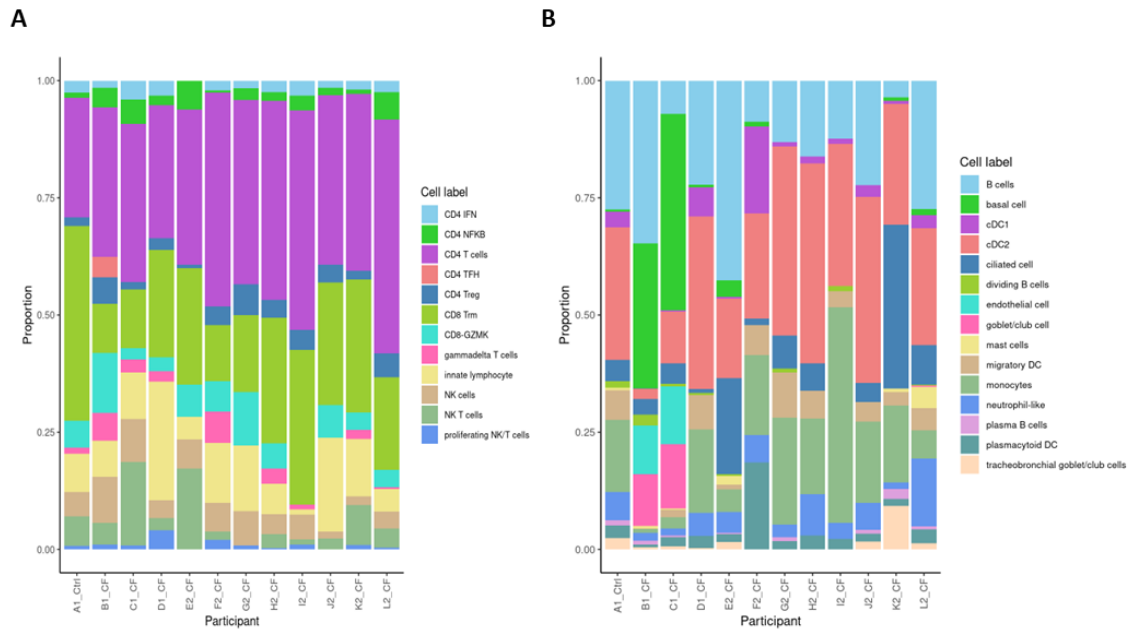

**Supplementary Figure 2.** Proportions of subpopulations in each individual identified by a sub-clustering analysis of **(A)** T/NK cells and **(B)** all other cells (not macrophages, not T/NK cells). Data is expressed as a proportion of all cells in the parent clusters.
